# Supplementary material
Source: PubMed Central journal article supplement (PMC4978125)
Supplement: NIHMS802652-supplement-Supplement.pdf [file NIHMS802652-supplement-Supplement.pdf]

## Supplementary Online Content

Jain N, Jia Y, Gao SS, et al. Optical coherence tomography angiography in choroideremia: correlating choriocapillaris loss with overlying degeneration. *JAMA Ophthalmol*. Published online May 5, 2016.  
doi:10.1001/jamaophthalmol.2016.0874.

**eTable.** Electroretinography results and normative ranges.

**eFigure.** Spatial correlation of atrophy at different tissue layers in a man in his late 40s (top row) and a man in his mid-30s with more advanced disease (bottom row).

This supplementary material has been provided by the authors to give readers additional information about their work.

**eTable.** Electroretinography results and normative ranges.

| Subject | Eye | Gender | Age at time of ERG | Photopic 6.0 (μV)     |                   | Scotopic 0.01 (μV)    |                   | Scotopic 6.0 (μV)     |                   |
|---------|-----|--------|--------------------|-----------------------|-------------------|-----------------------|-------------------|-----------------------|-------------------|
|         |     |        |                    | b-wave amplitude (μV) | Normal range (μV) | b-wave amplitude (μV) | Normal range (μV) | b-wave amplitude (μV) | Normal range (μV) |
| CHM02   | OD  | M      | n/a                | n/a                   | n/a               | n/a                   | n/a               | n/a                   | n/a               |
|         | OS  | M      | n/a                | n/a                   | n/a               | n/a                   | n/a               | n/a                   | n/a               |
| CHM03   | OD  | F      | n/a                | n/a                   | n/a               | n/a                   | n/a               | n/a                   | n/a               |
|         | OS  | F      | n/a                | n/a                   | n/a               | n/a                   | n/a               | n/a                   | n/a               |
| CHM04   | OD  | M      | 34                 | 0                     | 111-309           | 0                     | 250-473           | 0                     | 450-725           |
|         | OS  | M      | 34                 | 0                     | 111-309           | 0                     | 250-473           | 0                     | 450-725           |
| CHM05   | OD  | F      | 47                 | 142                   | 85-278            | 363                   | 212-436           | 565                   | 411-686           |
|         | OS  | F      | 47                 | 110                   | 85-278            | 151                   | 212-436           | 340                   | 411-686           |
| CHM06   | OD  | M      | 41                 | 15                    | 95-288            | 24                    | 225-448           | 37                    | 424-699           |
|         | OS  | M      | 41                 | 11                    | 95-288            | 16                    | 225-448           | 22                    | 424-699           |
| CHM07   | OD  | M      | 43                 | 17                    | 95-288            | 29                    | 225-448           | 66                    | 424-699           |
|         | OS  | M      | 43                 | 17                    | 95-288            | 30                    | 225-448           | 75                    | 424-699           |
| CHM08   | OD  | M      | 8                  | 286                   | 164-362           | 350                   | 313-536           | 618                   | 514-790           |
|         | OS  | M      | 8                  | 226                   | 164-362           | 240                   | 313-536           | 528                   | 514-790           |
| CHM09   | OD  | M      | 12                 | 41                    | 153-352           | 23                    | 300-524           | 83                    | 501-777           |
|         | OS  | M      | 12                 | 41                    | 153-352           | 21                    | 300-524           | 104                   | 501-777           |
| CHM10   | OD  | M      | 7                  | 81                    | 102-276           | 26                    | 155-409           | 159                   | 290-634           |
|         | OS  | M      | 7                  | 85                    | 102-276           | 26                    | 155-409           | 163                   | 290-634           |

**eFigure.** Spatial correlation of atrophy at different tissue layers in a man in his late 40s (top row) and a man in his mid-30s with more advanced disease (bottom row).

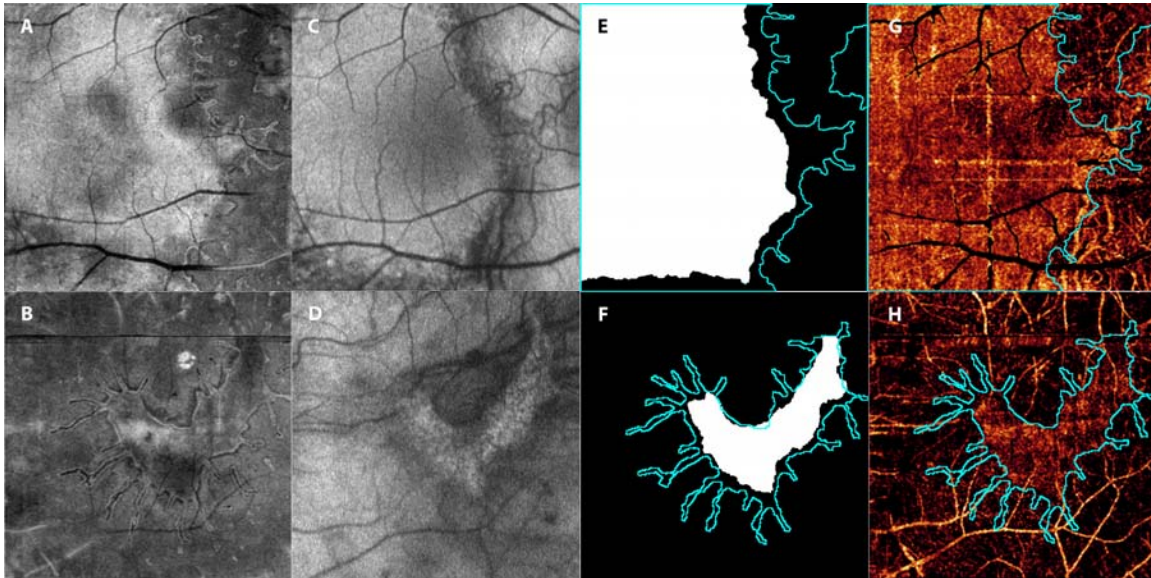

(A, B) Central island of relatively preserved EZ, measuring 23.0 mm<sup>2</sup> and 6.0 mm<sup>2</sup>, respectively. Pseudopodial extensions are longer in the eye with more advanced disease. (C,D) Co-registered fundus autofluorescence image demonstrating region of preserved RPE, measuring 19.6 mm<sup>2</sup> and 3.8 mm<sup>2</sup>, respectively. (E,F) Manual delineation of margins of preserved EZ (cyan tracing) and RPE (black and white) demonstrates that RPE loss is more extensive than EZ loss. (G, H) Margins of CC degeneration are less well defined, particularly in milder disease. There is no apparent preservation of CC associated with pseudopodial extensions of EZ.
